## Correction

# Correction: CDKN2A is a prognostic biomarker and correlated with immune infiltrates in hepatocellular carcinoma

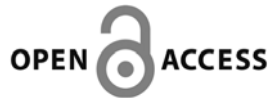

The authors of the original article “CDKN2A is a prognostic biomarker and correlated with immune infiltrates in hepatocellular carcinoma.” (*Biosci Rep* (2021) 41(10), <https://doi.org/10.1042/BSR20211103>) would like to correct Table 2. Due to their negligence, they had switched the number of high CDKN2A expression deaths with that of survivals in Table 2. This reversal in figures is corrected in this Correction.

**Table 2** Demographic and clinicopathological parameters of patients with hepatocellular carcinoma (data from 35 clinical patients)

| Clinicopathological factor | Number of cases(n = 35) | CDKN2A          |                | P            |
|----------------------------|-------------------------|-----------------|----------------|--------------|
|                            |                         | High expression | Low expression |              |
| <b>Age</b>                 |                         |                 |                |              |
| <55                        | 7                       | 5               | 2              | 0.156        |
| ≥55                        | 28                      | 19              | 9              |              |
| <b>Gender</b>              |                         |                 |                |              |
| Male                       | 20                      | 14              | 6              | 0.892        |
| Female                     | 15                      | 10              | 5              |              |
| <b>TNM stage</b>           |                         |                 |                |              |
| I-II                       | 16                      | 11              | 5              | 0.053        |
| III-IV                     | 19                      | 13              | 6              |              |
| <b>Grade</b>               |                         |                 |                |              |
| I-II                       | 14                      | 10              | 4              | 0.684        |
| III-IV                     | 21                      | 14              | 7              |              |
| <b>Survival status</b>     |                         |                 |                |              |
| Death                      | 16                      | 14              | 2              | <b>0.035</b> |
| Survival                   | 19                      | 10              | 9              |              |

Version of Record published:  
06 January 2022
